# Supplementary material
Source: PubMed Central journal article supplement (PMC7519283)
Supplement: pnas.2007773117.sapp.pdf [file pnas.2007773117.sapp.pdf]

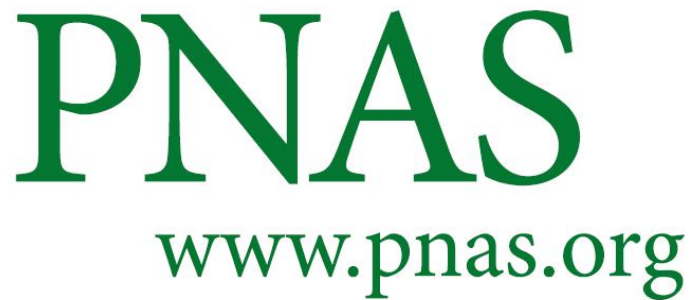

Supplementary Information for

**Neural progenitor cells pyroptosis contributes to Zika virus-induced brain atrophy and represents a therapeutic target**

Zhenjian He <sup>a, g, 1</sup>, Shu An <sup>b, g, 1</sup>, Jiahui Chen <sup>c, d</sup>, Shuqing Zhang <sup>b, g</sup>, Chahui Tan <sup>b, g</sup>, Jianchen Yu <sup>b, g</sup>, Hengming Ye <sup>a, g</sup>, Yun Wu <sup>b, g</sup>, Jie Yuan <sup>e, g</sup>, Jueheng Wu <sup>b, g</sup>, Xun Zhu <sup>b, g, 2</sup>, Mengfeng Li <sup>b, f, g, 2</sup>

Corresponding author: Mengfeng Li and Xun Zhu

Email: [limf@mail.sysu.edu.cn](mailto:limf@mail.sysu.edu.cn) or [zhuxun8@mail.sysu.edu.cn](mailto:zhuxun8@mail.sysu.edu.cn).

**This PDF file includes:**

Figures S1 to S5

**Figure S1**

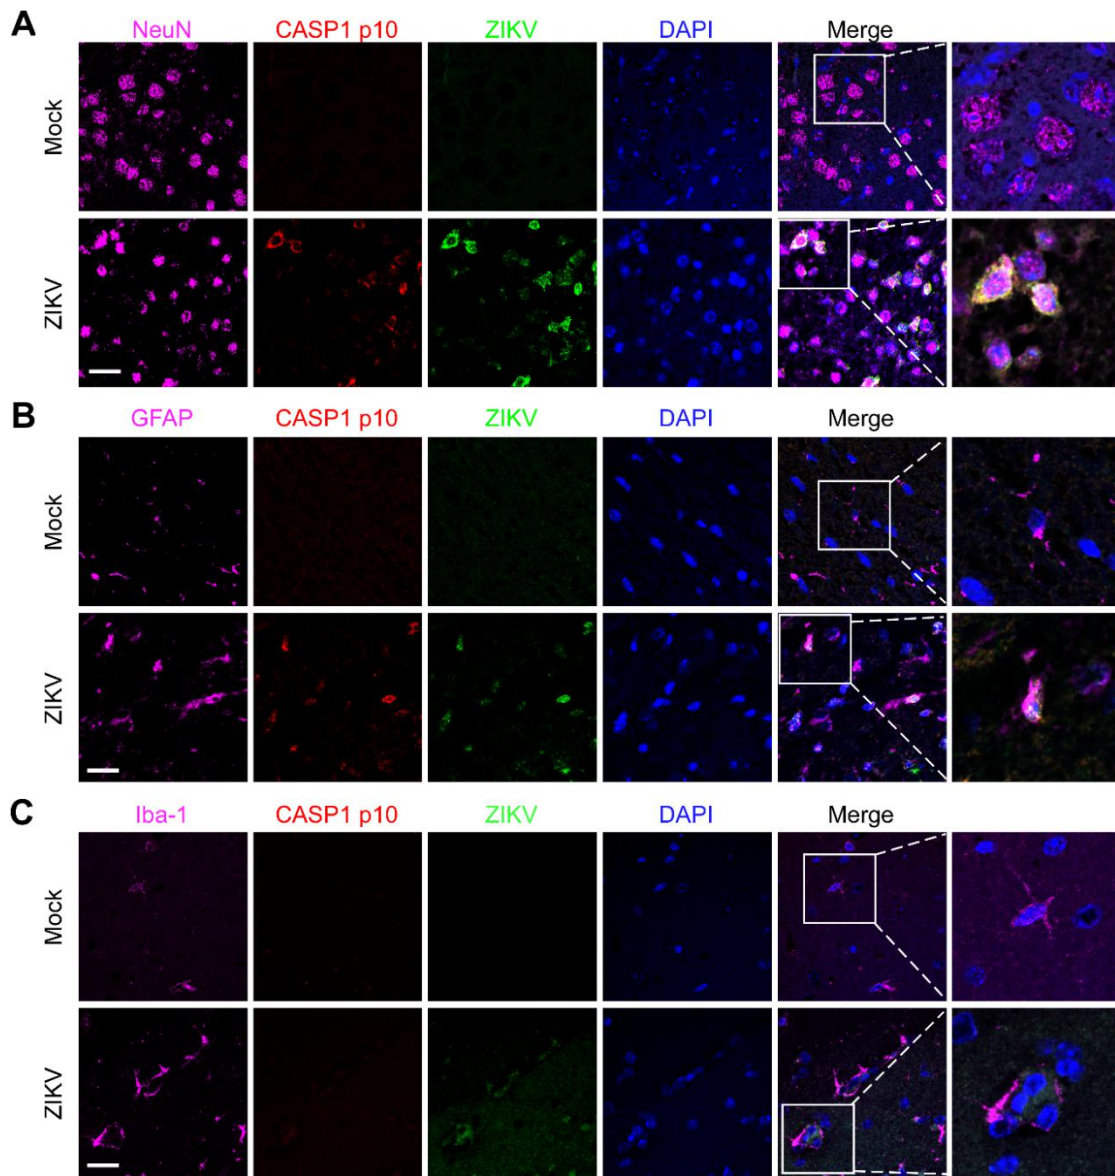

**Fig. S1. ZIKV infects NPCs and causes pyroptosis *in vivo*.**

Three-day-old mouse pups were subcutaneously infected with  $5 \times 10^5$  PFUs of ZIKV or mock-infected. **(A)** Representative micrographs of the brain tissue co-stained for NeuN, cleaved-caspase-1 (p10) and ZIKV NS3 protein (21 dpi). **(B)** Representative micrographs of the brain tissue co-stained for GFAP, cleaved-caspase-1 (p10) and ZIKV NS3 protein (21 dpi). **(C)** Representative micrographs of the brain tissue co-stained for Iba-1, cleaved-caspase-1 (p10) and ZIKV NS3 protein (21 dpi). The nuclei were stained with DAPI. Scale bar, 25  $\mu$ m.

**Figure S2**

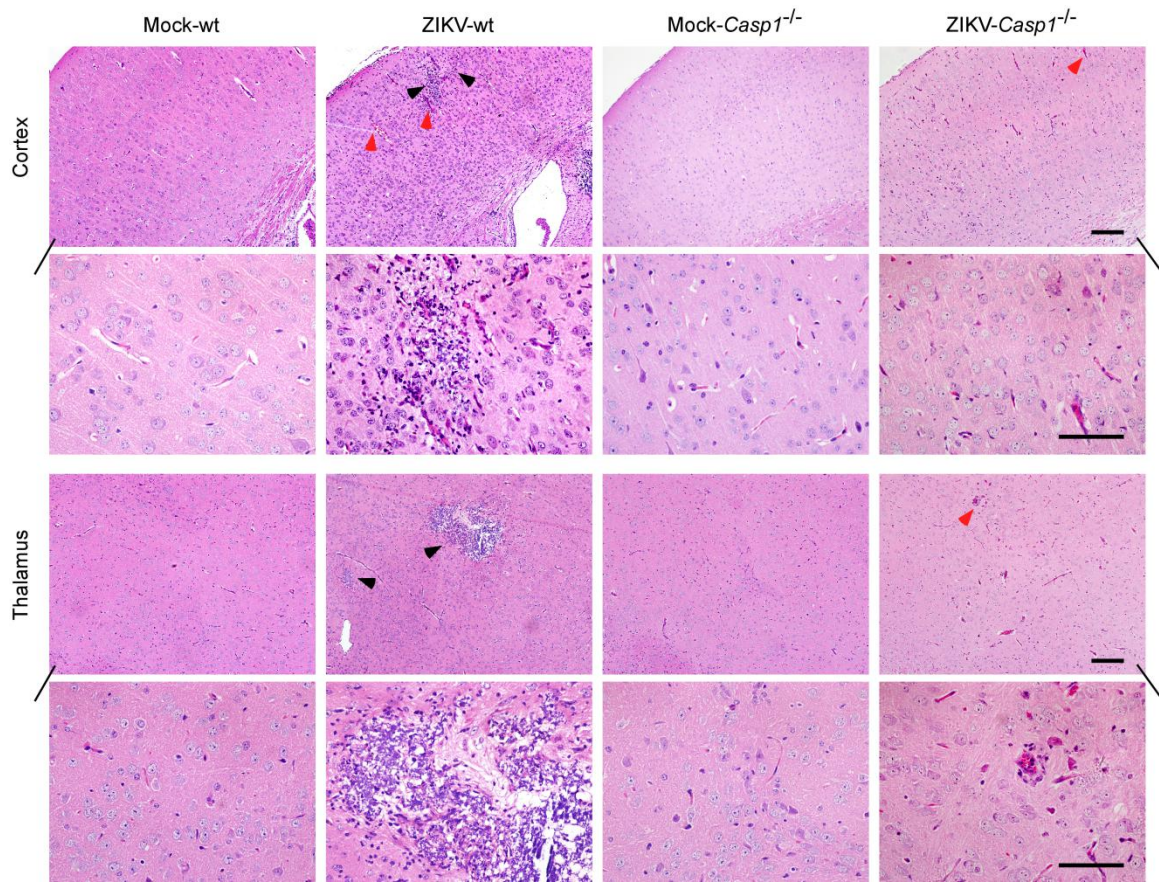

**Fig. S2. *Caspase-1* KO restores neuropathological alterations induced by ZIKV in mice.**

Three-day-old mouse pups of WT or *Casp1*<sup>-/-</sup> were subcutaneously infected with  $5 \times 10^5$  PFUs of ZIKV or mock-infected. Representative micrographs of the cortex and thalamus of WT or *Casp1*<sup>-/-</sup> mice with or without ZIKV infection (21 dpi). Black arrow: necrotic loci; Red arrowhead: perivascular cuffing. Scale bars, 100  $\mu\text{m}$  (upper panels), 50  $\mu\text{m}$  (lower panels).



**Figure S3**

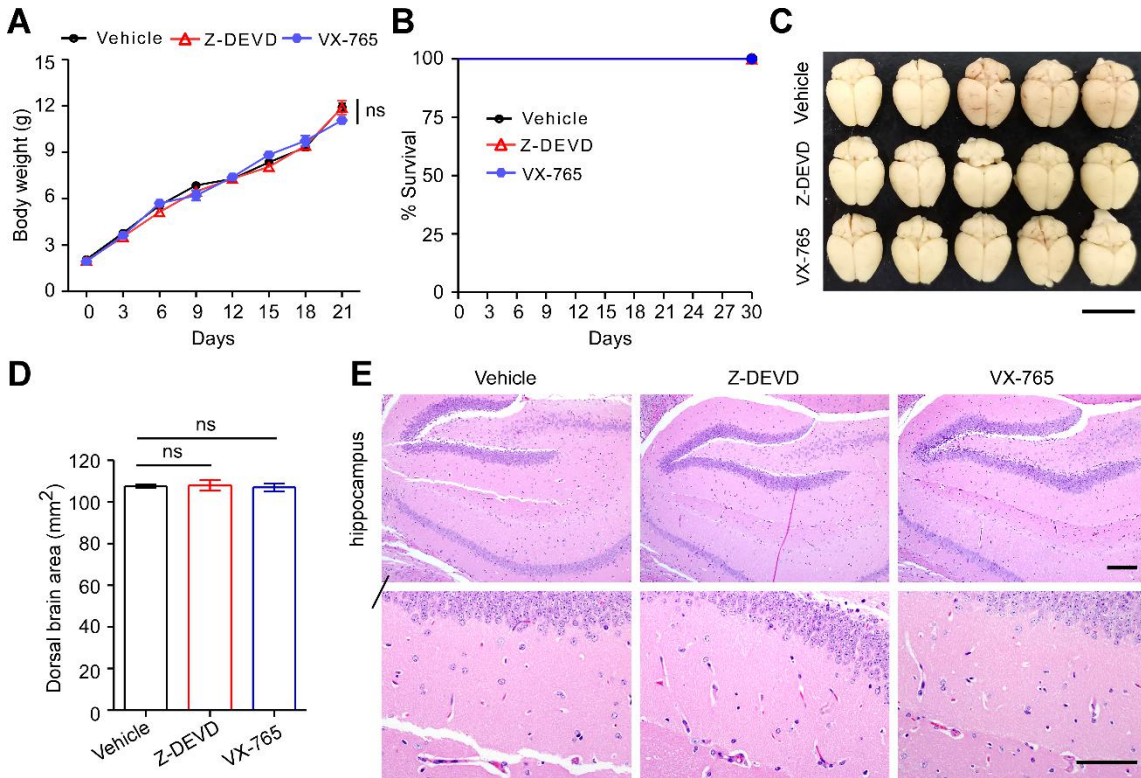

**Fig. S3. VX-765 or Z-DEVD-FMK treatment does not induce neuroinflammation and brain atrophy in mock-infected mice.**

Three-day-old mouse pups were subsequently treated with VX-765 (50 mg/kg, i.p.), or Z-DEVD-FMK (50 mg/kg, i.p.), or with vehicle (PBS/DMSO) every two days. **(A)** Body weight curves of mock-infected mice treated with VX-765, Z-DEVD-FMK or control vehicle. **(B)** Survival curves of mock-infected mice treated with VX-765, Z-DEVD-FMK or control vehicle. **(C)** Representative images of brains from mock-infected mice treated with VX-765, Z-DEVD-FMK or vehicle (30 days). Scale bars, 1 cm. **(D)** Dorsal brain area of mice was measured and shown in the histogram. **(E)** Representative micrographs of histopathological analysis with H&E staining of the hippocampus of mock-infected mice treated with VX-765, Z-DEVD-FMK or vehicle. Scale bars, 100  $\mu$ m (upper panels), 50  $\mu$ m (lower panels).

**Figure S4**

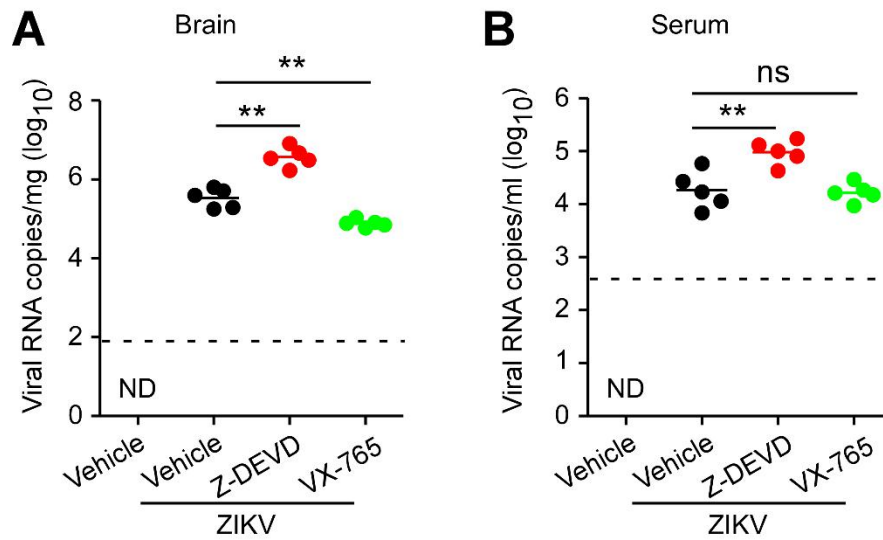

**Fig. S4. Quantification of ZIKV RNA copies in mice brain and serum.**

Three-day-old mouse pups were subcutaneously infected with  $1 \times 10^6$  PFUs of ZIKV or mock-infected, and subsequently treated with VX-765 (50 mg/kg, i.p.), or Z-DEVD-FMK (50 mg/kg, i.p.), or with vehicle (PBS/DMSO) every two days. Brain (A) and serum (B) specimens of mice were collected and subjected to ZIKV RNA examination using qRT-PCR method ( $n = 5$ ). Dotted line depicts the limit of detection for the assays. Data are presented as mean  $\pm$  SD, Student's t-test. ns, not significant. ND, not detectable.

**Figure S5**

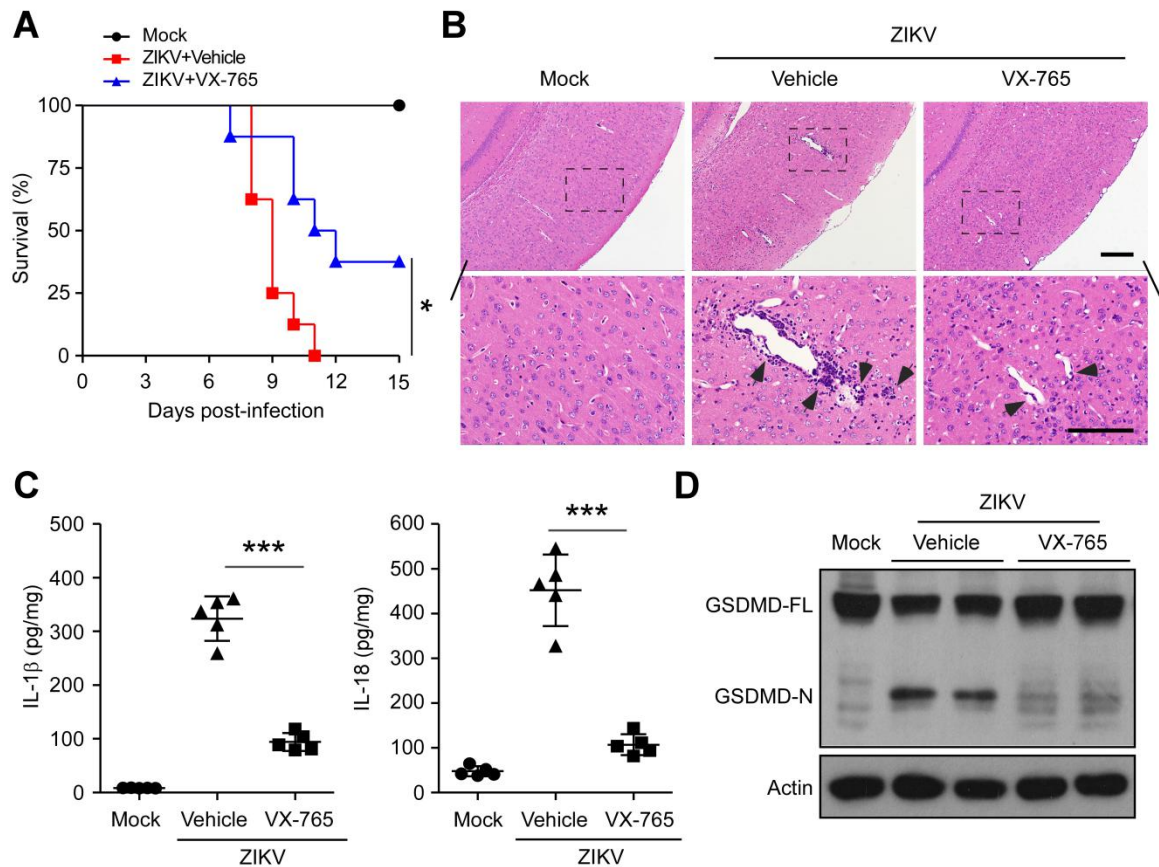

**Fig. S5. VX-765 treatment improves survival of ZIKV-infected mice and reduces neuroinflammation and pyroptosis.**

Five-week-old *Ifnar1*<sup>-/-</sup> mice were infected with ZIKV ( $1 \times 10^5$  PFU) or mock-infected, and subsequently treated with VX-765 (50 mg/kg, i.p.) or with vehicle (PBS/DMSO) daily. **(A)** Mice were monitored for survival over 15 days ( $n = 8$ ).  $P$  value is based on a log-rank test.  $*P < 0.05$ . **(B)** Representative micrographs of histopathological changes in brain sections of the cortex. Brain tissue sections obtained from ZIKV-infected mice showed inflammation characterized by infiltration of immune cells in the perivascular cuffing (black arrow). Scale bars, 100  $\mu\text{m}$  (upper panels), 50  $\mu\text{m}$  (lower panels). **(C)** IL-1 $\beta$  and IL-18 were measured by ELISA in brain specimens of ZIKV- and mock-infected mice treated with VX-765 or control vehicle. All data are presented as mean  $\pm$  SD, Student's  $t$ -test,  $***P < 0.001$ . **(D)** Proteolytic cleavage of GSDMD in the brain

specimens of indicated mice was determined by immunoblotting analysis. GSDMD-FL, full-length GSDMD; GSDMD-N, the N-terminal cleavage product of GSDMD.
